# Supplementary material for: Colorimetric determination of thiol compounds in serum based on Fe-MIL-88NH2 metal–organic framework as peroxidase mimetics
Source: Royal Society of Chemistry journal article supplement (doi:10.1039/c4ay00747f), 2014-01-01
Supplement: c4ay00747f1.pdf [file c4ay00747f1.pdf]

## Supporting Information

*for*

### **Colorimetric determination of thiol compounds in serum based on Fe-MIL-88NH<sub>2</sub> metal-organic framework as peroxidase mimetics**

Zhongwei Jiang, Yali Liu, Xiaoli Hu, Yuanfang Li\*

*Key Laboratory of Luminescent and Real-Time Analytical Chemistry (Southwest University), Ministry of Education, College of Chemistry and Chemical Engineering, Southwest University, Chongqing 400715, China. E-mail: [liyf@swu.edu.cn](mailto:liyf@swu.edu.cn), Tel: (+86) 23 68254659, Fax: (+86) 23 68367257.*

**Synthesis of Fe-MIL-88NH<sub>2</sub>:** Fe-MIL-88NH<sub>2</sub> was prepared according to the previous work of our group.<sup>1</sup> Briefly, 0.187g (0.692mmol) of FeCl<sub>3</sub>•6H<sub>2</sub>O and 0.126g (0.692mmol) of 2-aminoterephthalic acid were dissolved in 15mL of DMF, and 200μL acetic acid was added into this mixture. The mix solution was placed in an oil bath at 120 °C for 4 h to crystallize. After cooling to room temperature, the particles were isolated by centrifugation and washed with DMF and ethanol three times to remove the excess reactants, respectively. Finally, the Fe-MIL-88NH<sub>2</sub> was dried in a vacuum oven.

**Additional figures**

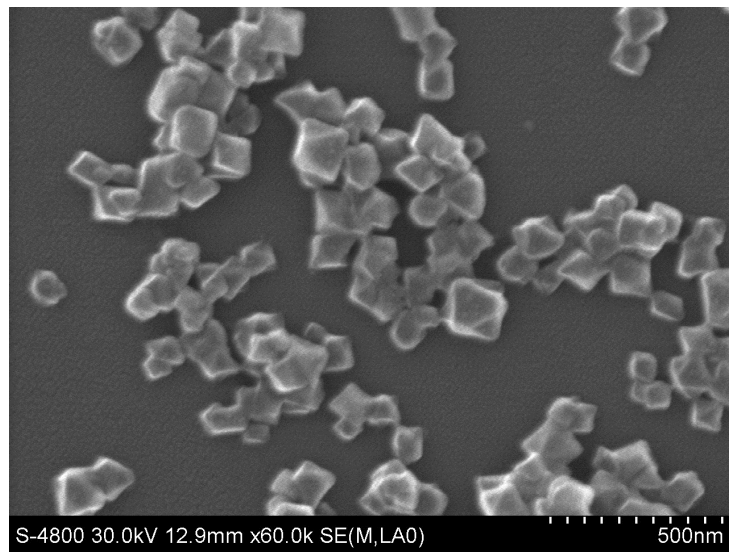

Fig.S1 SEM images of Fe-MIL-88NH<sub>2</sub> microcrystals

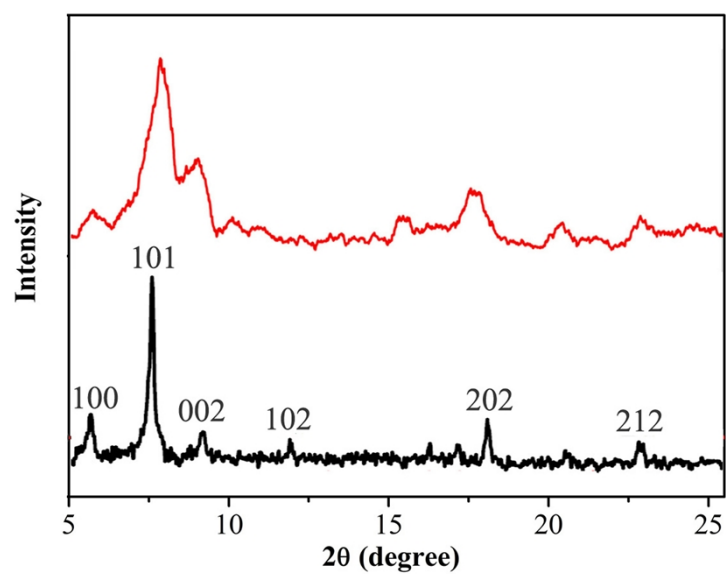

Fig.S2 Powder XRD patterns of Fe-MIL-88NH<sub>2</sub> (red), and the simulated XRD pattern of the reported Fe-MIL-88NH<sub>2</sub> (black).<sup>2</sup>

**Table S1: The comparison of present method with other methods for thiols detection**

| Analyte      | Detection method | Linear range    | Detection limit | Reference |
|--------------|------------------|-----------------|-----------------|-----------|
|              |                  | / $\mu\text{M}$ | / $\mu\text{M}$ |           |
| Homocysteine | Capillary        |                 | 0.5             |           |
| Glutathione  |                  | 1.0-200.0       | 1               | (3)       |
| Cysteine     | Electrophoresis  |                 | 2               |           |
| Cysteine     | Near-infrared    |                 |                 |           |
|              | fluorescent      | 10.0-500.0      | 1.26            | (4)       |
| Cysteine     | Fluorometry      | 16.5-33.0       | 1.0             | (5)       |
| Cysteine     |                  | 1.0-80.0        | 0.39            |           |
| Homocysteine | Colorimetry      | 1.0-80.0        | 0.4             | Present   |
| Glutathione  |                  | 1.0-100.0       | 0.45            | method    |

## References

1. Y. L. Liu, X. J. Zhao, X. X. Yang and Y. F. Li, *Analyst*, 2013, **138**, 4526-4531.
2. M. Ma, H. Noei, B. Mienert, J. Niesel, E. Bill, M. Muhler, R. A. Fischer, Y. Wang, U. Schatzschneider and N. Metzler-Nolte, *Chem. Eur. J.*, 2013, **19**, 6785-6790.
3. S. H. K., J. W. K. and D. S. Chung, *J. Pharm. Biomed. Anal.*, 1997, **15**, 1435-1441.
4. Y. S. Guan, L. Y. Niu, Y. Z. Chen, L. Z. Wu, C. H. Tung and Q. Z. Yang, *RSC Adv.*, 2014, **4**, 8360-8364.
5. B. Liu, J. Wang, G. Zhang, R. Bai and Y. Pang, *ACS Appl. Mater. Interfaces*, 2014, **6**, 4402-4407.
